# Supplementary material
Source: Research Square preprint supplement (doi:10.21203/rs.3.rs-8047483/v2)
Supplement: Supplementary file 1 [file f310c092108a98d0deb6247a.xlsx]

## Sheet: Sheet1
							deepTools Fingerprint (after filtering)														CollectAlignmentSummaryMetrics (after filtering)								Picard deduplication (before filtering)
sequencing Sample ID	Diagnosis	IP process	Description of ICD code	Organ of primary tumor	TNM	Stage K	AUC	Synthetic AUC	X-intercept	Synthetic X-intercept	Elbow Point	Synthetic Elbow Point	Synthetic JS Distance	sample_quantiles	fingerprint_quantile_80	fingerprint_quantile_85	fingerprint_quantile_90	fingerprint_quantile_95	fingerprint_quantile_97	fingerprint_quantile_99	TOTAL_READS	PF_ALIGNED_BASES	PF_HQ_ALIGNED_READS	PF_HQ_ALIGNED_BASES	PF_HQ_ALIGNED_Q20_BASES	PF_MISMATCH_RATE	PF_HQ_ERROR_RATE	PF_INDEL_RATE	Unique Pairs	Duplicate Pairs Optical	Duplicate Pairs Nonoptical	PCR duplicate rate
S01	K	IP CTCF 3Ml - 645_BD T0-1	Colon unspecified	colon			0.38802	0.487118	0.00111111	9.01e-51	0.566667	0.523161	0.173004	VO21_S01_REP1.range50-80.mLb.clN	0.677895	0.738251	0.800957	0.87044	0.908393	0.954058	45122	4502703	44953	4486253	4391146	0.003535	0.003526	0.000214	10944836	112916	251490	0.032222
S02	K	IP CTCF 3Ml - 653_BD T0-1	Bronchus or lung unspecified	lung	rTX pNX pM1	IV	0.261048	0.490462	0.00032916	1.91e-93	0.750823	0.494057	0.356	VO21_S02_REP1.range50-80.mLb.clN	0.43768	0.501712	0.59027	0.726036	0.803606	0.911182	233754	23327347	232979	23250509	22745545	0.003522	0.003513	0.000217	26231816	312106	615140	0.0341413
S03	H	IP CTCF 3Ml - 0412744_2	IP CTCF 3Ml - 0412744_2				0.385998	0.487122	0.00015056	8.37e-51	0.535531	0.520472	0.171531	VO21_S03_REP1.range50-80.mLb.clN	0.677766	0.738483	0.801828	0.878267	0.918848	0.965319	21162	2112529	21087	2105043	2061335	0.003846	0.003833	0.000316	16528076	182150	287826	0.0276488
S04	K	IP CTCF 3Ml - 646_BD T0-1	Sigmoid colon	colon	pT3 pN2b cM0 GL R0 L1 V0 Pn1	IIIC	0.360531	0.487675	0.00022482	1.51e-55	0.663444	0.519252	0.207504	VO21_S04_REP1.range50-80.mLb.clN	0.625792	0.682972	0.749949	0.841221	0.885613	0.946647	125704	12545573	125272	12503202	12226879	0.003503	0.003488	0.000237	16194538	156982	434474	0.0352351
S05	K	IP CTCF 3Ml - 647_BD T0-1	Malignant neoplasm of rectum	colon	pT3 pN1 cM1 G2 RX LX VX PnX	IV	0.317414	0.488725	6.83e-05	1.46e-66	0.82355	0.500488	0.291121	VO21_S05_REP1.range50-80.mLb.clN	0.544417	0.595778	0.665764	0.75213	0.797061	0.879495	1146488	114492337	1143886	114239841	111984108	0.003054	0.003045	0.000254	21120868	276316	587020	0.0392707
S06	K	IP CTCF 3Ml - 654_BD T0-1	Bronchus or lung unspecified	lung	cT2 cN0 cM1a	IVA	0.295376	0.489758	0.00039047	6.81e-81	0.71886	0.494918	0.297476	VO21_S06_REP1.range50-80.mLb.clN	0.508172	0.579782	0.666798	0.787018	0.850724	0.931769	240334	23981561	239531	23902013	23380293	0.0036	0.003589	0.00022	35444992	414324	1071008	0.0402198
S07	K	IP CTCF 3Ml - 655_BD T0-1	Bronchus or lung unspecified	lung	cT4 cN3 cM1a	IVA	0.343031	0.488347	0.00043403	2.97e-62	0.734375	0.500033	0.245212	VO21_S07_REP1.range50-80.mLb.clN	0.589223	0.646089	0.72206	0.812996	0.855438	0.910484	191380	19104891	190861	19053436	18662084	0.003243	0.003236	0.000252	33884914	397830	933296	0.0377989
S08	H	IP CTCF 3Ml - 0412755_2	IP CTCF 3Ml - 0412755_2				0.377577	0.487428	6.91e-05	2.37e-53	0.598881	0.522993	0.18005	VO21_S08_REP1.range50-80.mLb.clN	0.657634	0.716918	0.781735	0.872037	0.914645	0.962231	786538	78575949	785310	78454891	76953396	0.002894	0.002884	0.000268	24259886	324144	536490	0.0342602
S09	H	IP CTCF 3Ml - 0412764_2	IP CTCF 3Ml - 0412764_2				0.375247	0.487477	0.00011293	8.85e-54	0.608809	0.523173	0.182771	VO21_S09_REP1.range50-80.mLb.clN	0.653436	0.712699	0.779704	0.870619	0.913101	0.960671	57930	5780254	57677	5755142	5628907	0.003661	0.003643	0.00025	23492258	273684	545508	0.0336957
S10	K	IP CTCF 3Ml - 648_BD T0-1	Sigmoid colon	colon	cTX cN0 cM1	IV	0.37626	0.487529	0.00067476	3.1e-54	0.640351	0.521035	0.184359	VO21_S10_REP1.range50-80.mLb.clN	0.650077	0.708002	0.771448	0.860653	0.903356	0.957903	42188	4209684	42039	4195263	4105148	0.003514	0.003505	0.000235	10595676	96328	215204	0.028562
S11	K	IP CTCF 3Ml - 656_BD T0-1	Bronchus or lung unspecified	lung	cT4 cN3 cM1b	IVA	0.32628	0.488689	0.00025019	3.89e-66	0.789342	0.500033	0.259108	VO21_S11_REP1.range50-80.mLb.clN	0.556728	0.617699	0.697631	0.799656	0.855889	0.931536	252750	25221870	251961	25144051	24595587	0.003603	0.003593	0.000244	18090708	212914	325716	0.028913
S12	K	IP CTCF 3Ml - 657_BD T0-1	Upper lobe bronchus or lung	lung	cT3 cN3 cM0 G3	IIIC	0.291167	0.48943	5.77e-05	6.98e-76	0.797229	0.512694	0.334829	VO21_S12_REP1.range50-80.mLb.clN	0.49438	0.554119	0.623617	0.706539	0.751737	0.841805	2359584	235638280	2355161	235206291	230437697	0.002972	0.002965	0.000279	30951972	403746	943564	0.0417133
S13	H	IP CTCF 3Ml - 0412765_2	IP CTCF 3Ml - 0412765_2				0.379744	0.487177	0.00054885	2.99e-51	0.556531	0.519001	0.183018	VO21_S13_REP1.range50-80.mLb.clN	0.666792	0.726977	0.79007	0.866796	0.907639	0.953897	71770	7165492	71594	7148534	6998344	0.003279	0.003269	0.000293	16971944	189830	313334	0.0287932
S14	H	IP CTCF 3Ml - 0412771_2	IP CTCF 3Ml - 0412771_2				0.336643	0.488357	0.00062073	2.33e-62	0.725636	0.492013	0.247613	VO21_S14_REP1.range50-80.mLb.clN	0.580388	0.649594	0.731188	0.823713	0.865974	0.919234	110290	11015002	110116	10997796	10779723	0.002984	0.002976	0.000257	33809696	381436	1331348	0.0482169
S15	K	IP CTCF 3Ml - 649_BD T0-1	Colon unspecified	colon	pT3 pN2 pM1b G1 RX L1 V1 PnX	IVB	0.216825	0.491243	0.00030893	4.48e-111	0.813407	0.5004	0.434699	VO21_S15_REP1.range50-80.mLb.clN	0.34599	0.400293	0.486568	0.64072	0.736864	0.875701	182822	18242261	182237	18184228	17786731	0.003531	0.003528	0.000233	13624024	132588	296148	0.030509
S16	K	IP CTCF 3Ml - 650_BD T0-1	Colon unspecified	colon	cT4 cN2 cM1b	IVB	0.307267	0.488874	0.00026575	2.2e-68	0.842944	0.493538	0.298896	VO21_S16_REP1.range50-80.mLb.clN	0.523018	0.57269	0.644091	0.746674	0.810837	0.90562	245284	24478767	244458	24397067	23867513	0.003393	0.003384	0.000235	11634606	113734	240706	0.0295637
S17	K	IP CTCF 3Ml - 658_BD T0-1	Overlapping lesion of bronchus and lung	lung	pT4 pN2 M1b	IVA	0.345316	0.488188	0.00025038	1.45e-60	0.715073	0.497217	0.23627	VO21_S17_REP1.range50-80.mLb.clN	0.595546	0.653538	0.731142	0.824278	0.868065	0.926182	306188	30553451	305101	30446241	29808406	0.003513	0.003501	0.000212	28443248	331434	687052	0.0345698
S18	H	IP CTCF 3Ml - 0412734_2	IP CTCF 3Ml - 0412734_2				0.363335	0.48771	0.00035199	7.22e-56	0.641675	0.493399	0.204638	VO21_S18_REP1.range50-80.mLb.clN	0.630654	0.688819	0.759154	0.848801	0.891024	0.942307	101104	10089340	100735	10052556	9834558	0.003587	0.003575	0.00023	33517604	355284	857184	0.0349112
S19	H	IP CTCF 3Ml - 0412754_2	IP CTCF 3Ml - 0412754_2				0.383929	0.487164	0.00029931	3.82e-51	0.550135	0.491709	0.170255	VO21_S19_REP1.range50-80.mLb.clN	0.672703	0.733832	0.797441	0.878533	0.919487	0.966681	171842	17156891	171431	17116061	16765646	0.003298	0.003288	0.000256	20289308	230746	425742	0.0313422
S20	K	IP CTCF 3Ml - 651_BD T0-1	Malignant neoplasm of rectum	colon	cT4 cN1 cM1b	IVB	0.348332	0.48805	0.00042517	3.75e-59	0.719813	0.506467	0.232508	VO21_S20_REP1.range50-80.mLb.clN	0.601077	0.655856	0.723575	0.815093	0.861925	0.927809	101322	10109158	100933	10070959	9847896	0.003574	0.00356	0.000228	11686552	111984	307374	0.0346408
S21	K	IP CTCF 3Ml - 652_BD T0-1	Malignant neoplasm of rectum	colon	cT3 cN1 cM1	IV	0.374901	0.487385	0.00036443	5.54e-53	0.618805	0.517981	0.189912	VO21_S21_REP1.range50-80.mLb.clN	0.65285	0.711284	0.77254	0.851874	0.89304	0.94632	68848	6872118	68600	6847431	6698689	0.003447	0.003434	0.000243	12802794	123358	304492	0.0323378
S22	H	IP CTCF 3Ml - 0412772_2	IP CTCF 3Ml - 0412772_2				0.386893	0.487399	0.00195313	4.21e-53	0.621094	0.508098	0.173128	VO21_S22_REP1.range50-80.mLb.clN	0.665115	0.724173	0.783994	0.858062	0.895788	0.942717	29690	2963407	29604	2954994	2892638	0.003558	0.003545	0.000247	10304768	121668	167302	0.0272774
S23	H	IP CTCF 3Ml - 0412778_2	IP CTCF 3Ml - 0412778_2				0.338343	0.488407	0.00083542	6.56e-63	0.725146	0.51571	0.246108	VO21_S23_REP1.range50-80.mLb.clN	0.580781	0.647401	0.726153	0.820211	0.862583	0.916422	35784	3572994	35670	3561809	3489768	0.003287	0.003276	0.000254	29629378	315438	1154842	0.0472764
S24	H	IP CTCF 3Ml - 0412781_2	IP CTCF 3Ml - 0412781_2				0.347644	0.487826	0.00055279	5.9e-57	0.698176	0.509876	0.241288	VO21_S24_REP1.range50-80.mLb.clN	0.604069	0.660192	0.730934	0.81997	0.861806	0.911799	56210	5611387	56073	5598437	5483337	0.003284	0.003274	0.000271	22169706	227674	558322	0.0342397
